# Supplementary material for: Isoliquiritigenin alleviates early brain injury after experimental intracerebral hemorrhage via suppressing ROS- and/or NF-κB-mediated NLRP3 inflammasome activation by promoting Nrf2 antioxidant pathway
Source: PubMed Central journal article supplement (PMC5470182; doi:10.1186/s12974-017-0895-5), 2017-06-13
Supplement: 12974_2017_895_MOESM1_ESM.pdf [file 12974_2017_895_MOESM1_ESM.pdf]

1 A:

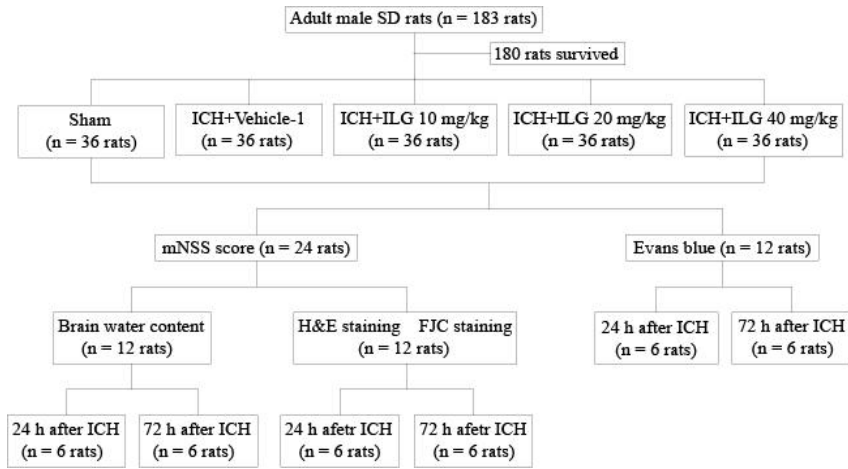

2

3 B:

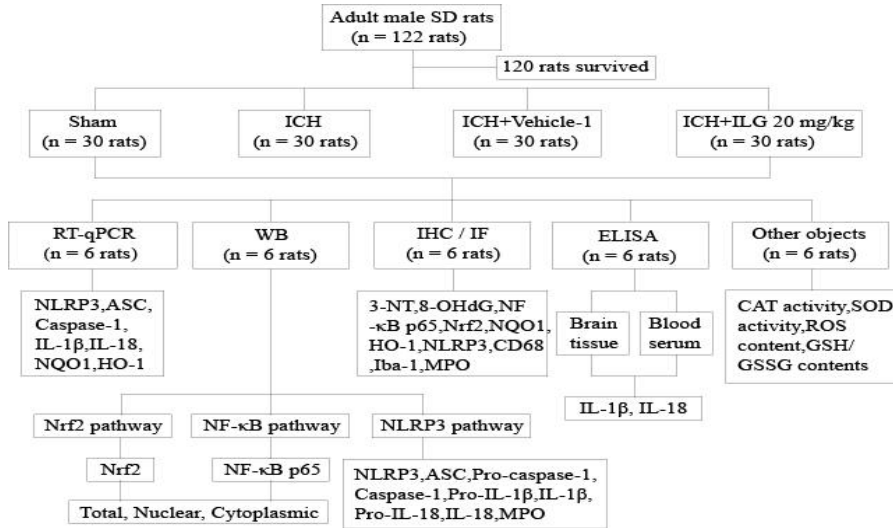

4

5 C:

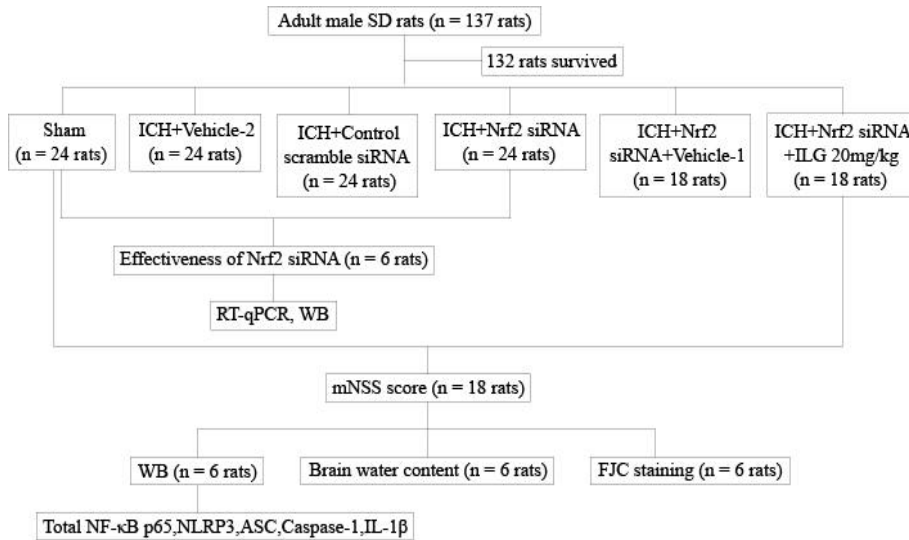

6

7 **D:**

8 **MRI and Hematoma Volume Evaluation**

9 Experiment design and groups:

10 Thirty rats were used in this study. Rats were randomly divided into five groups,  
11 namely, sham group, ICH + vehicle-1 24 h, ICH + ILG 20 mg/kg 24 h, ICH +  
12 vehicle-1 72 h, ICH + ILG 20 mg/kg 72 h. At the corresponding time points, rats were  
13 performed magnetic resonance imaging (MRI) and then hematoma volume  
14 evaluations were carried out (n = 6).

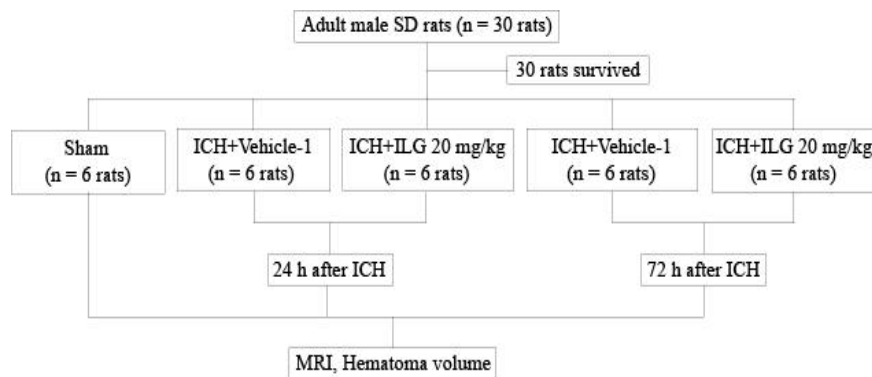

15

16 **Methods:**

17 MRI was conducted at 24 h and 72 h after ICH induction using a 7.0-T  
18 small-animal PharmaScan 70 / 16 MRI scanner (Bruker, USA) as previously  
19 performed[1, 2]. The rats were anesthetized with isoflurane and T2-weighted images  
20 (T2WI) were obtained using following parameters: Resolution matrix = 256 × 256,  
21 Field of view (FOV) = 35 mm × 35 mm, Slice number = 10, Slice thickness = 0.8 mm,  
22 slice gap = 0, TR / TE = 2500 ms / 33 ms. A skillful technician performed the image  
23 acquisition in a blinded manner[1, 2].

24 After MRI being performed, rats were deeply anesthetized and sacrificed to obtain  
25 whole brain, then serially sliced (2 mm thickness) anterior and posterior to the needle

26 entry site (identifiable on the brain surface). Coronal brain slices were photographed  
27 with a digital camera to get digital images. Then, the images were analyzed and  
28 hematoma volume was computed by using an Image J software package (National  
29 Institutes of Health, Baltimore, MD)[3, 4].

## 30 **References:**

- 31 [1]. Chen, Q., et al., Chronic hydrocephalus and perihematomal tissue injury developed in a rat model  
32 of intracerebral hemorrhage with ventricular extension. *Transl Stroke Res*, 2015. 6(2): p. 125-32.
- 33 [2]. MacLellan, C.L., et al., Intracerebral hemorrhage models in rat: comparing collagenase to blood  
34 infusion. *J Cereb Blood Flow Metab*, 2008. 28(3): p. 516-25.
- 35 [3]. Fang, H., et al., CD36-mediated hematoma absorption following intracerebral hemorrhage:  
36 negative regulation by TLR4 signaling. *J Immunol*, 2014. 192(12): p. 5984-92.
- 37 [4]. Liew, H.K., et al., Systemic administration of urocortin after intracerebral hemorrhage reduces  
38 neurological deficits and neuroinflammation in rats. *J Neuroinflammation*, 2012. 9: p. 13.

39

40 **E:**

### 41 **Additional file 2**

42 Effects of ILG on the hematoma volume and expansion at 24 h and 72 h after ICH  
43 (A, B) and effects of ILG on the number of CD68<sup>+</sup>, Iba-1<sup>+</sup> cells in the perihematomal  
44 brain tissue at 24 h after ICH (C-E). Representative MRI T2WI images (A) and  
45 quantitative analyses of hematoma volume (B) (n = 6 rats / group). Representative  
46 microscopic images (C) and quantitative analyses of CD68<sup>+</sup>, Iba-1<sup>+</sup> cells (D, E) (n = 6  
47 rats / group). Scale bar = 20  $\mu$ m. Values are reported as means  $\pm$  SD. \*\*  $p < 0.01$ , \*  $p$

48 < 0.05.

49 **Additional file 3**

50 Mechanism diagram. Underlying molecular mechanisms of ILG's neuroprotective  
51 effects on the early brain injury after ICH induction. ILG alleviated the early brain  
52 injury following ICH may be involved in the regulation of ROS and / or NF- $\kappa$ B on the  
53 activation of NLRP3 inflammasome pathway by the triggering of Nrf2 activity and  
54 the induction of Nrf2-mediated antioxidant system.

55
